# Supplementary material for: Value of Packaged Testing for Sexually Transmitted Infections for Persons who Inject Drugs Hospitalized With Serious Injection-Related Infections
Source: PubMed Central journal article supplement — Open Forum Infect Dis. 2021 Nov 11;8(11):ofab489. doi: 10.1093/ofid/ofab489 (PMC8675536; doi:10.1093/ofid/ofab489), 2021-11-11
Supplement: ofab489_suppl_supplementary_figure_1.pdf [file ofab489_suppl_supplementary_figure_1.pdf]

- For patients with opioid use disorder – addiction medicine consultation offered?
- Yes – patient accepted addiction medicine consult
  - No – patient declined offer of addiction medicine consultation

Injection drug use is a risk factor for communicable diseases - please order the following screening labs:

**Testing needed this admission**

|                       |                                                                    |                                                                                  |
|-----------------------|--------------------------------------------------------------------|----------------------------------------------------------------------------------|
| HIV                   | <input type="checkbox"/> HIV p24 Ag & 1/2 Ab                       | <input type="checkbox"/> HIV RNA                                                 |
| Hepatitis A immunity  | <input type="checkbox"/> Hepatitis A IgG                           |                                                                                  |
| Hepatitis B screening | <input type="checkbox"/> Hep B Surface Ag                          | <input type="checkbox"/> Hep B core Ab <input type="checkbox"/> Hep B surface Ab |
| Hepatitis C screening | <input type="checkbox"/> Hep C Ab                                  | <input type="checkbox"/> Hep C RNA                                               |
| Syphilis              | <input type="checkbox"/> RPR                                       |                                                                                  |
| Gonorrhea/Chlamydia   | <input type="checkbox"/> G/C urine nucleic acid amplification test |                                                                                  |
| Latent TB Testing     | <input type="checkbox"/> Interferon Gamma Release Assay            |                                                                                  |
| Pregnancy Testing     | <input type="checkbox"/> Urine beta HCG                            |                                                                                  |

**Immunizations needed this admission:**

- Hepatitis A vaccine
- Hepatitis B vaccine
- Combined Hepatitis A and Hepatitis B vaccine
- Tetanus booster

Harm reduction was discussed with patient during the visit including avoiding introduction of saliva into injecting process, cleaning injection sites, use of clean equipment and locations of nearest syringe exchange facilities.
